# Supplementary material
Source: ML conference proceedings conference paper supplement (https://openreview.net/forum?id=UdByCgCNdr)
Supplement: supplementary_material [file attachment]

'Avoidable',

'Inevitable'

– this means whether the action of you can actually save the life of people. Your action will create a different outcome – people will be saved if you perform the action.

"Inevitable" means no matter what you do, people will be killed.

(This is very hard to tag)

'influence agent'

'influence patient'

– this means "Agent of harm" vs. "Agent of victim/patient". Agent of harm means the "trolley" itself or the bus. Victim/patient means the person getting run over by the bus.

'accidental',

'Instrumental',

– 'accidental' means the death is a side-effect. "Instrumental" is that death is used to prevent other things.

Accordingly, Accidental harm refers to the case where the innocent victim of the dilemma dies as a non-desired side effect of the moral transgression that the protagonist carries out to save others. Conversely, Instrumental harm occurs when the protagonist intentionally uses the harm (i.e., the death) of the innocent victim as a means (i.e., instrumentally) to save the others.

'Personal',

'Impersonal',

– It's really about "touching", "physical contact"

– difference between Personal and Impersonal is whether the action is mechanically mediated or not

'self beneficial',

'other beneficial',

Personal Force, Benefit Recipient (who gets the benefit), Evitability (whether the death is avoidable, or not), and Intentionality (whether the harm is willed and used instrumentally or a side-effect).
